# Supplementary material
Source: HighWire-hosted journal article supplement (http://molpharm.aspetjournals.org/highwire/filestream/77372/field_highwire_adjunct_files/0/supplemental_dataREVISED.pdf)
Supplement: supplemental_dataREVISED.pdf [file supplemental_dataREVISED.pdf]

MOL #99663

Title: A molecular pharmacologist's guide to GPCR crystallography.

Authors: Chayne L. Piscitelli, James Kean, Chris de Graaf, Xavier Deupi

Journal: Molecular Pharmacology

## Supplemental Data

**Supplementary Table 1.** List of all crystallized GPCRs including the main modifications in the constructs.

## Class A

| Family | Receptor                                 | Truncation                                        | Stabilizing Mutations                                            | Other Mutations                                                 | Chimera    | Crystallization |        | PDB IDs                                                          |                        |
|--------|------------------------------------------|---------------------------------------------------|------------------------------------------------------------------|-----------------------------------------------------------------|------------|-----------------|--------|------------------------------------------------------------------|------------------------|
|        |                                          |                                                   |                                                                  |                                                                 |            | Tool            | Method |                                                                  |                        |
| Amine  | <b>β1 adrenergic</b><br><i>turkey</i>    | ΔN 3-32,<br>ΔC 368-483,<br>ΔICL3 244-271, 277-278 | R068S, M090V, Y227A, A282L, F327A,<br>F338M                      | C116L (exp.),<br>C358A (palm.)                                  |            |                 | VD     | 2VT4, 2YCW, 2YCX,<br>2YCY, 2YCZ                                  |                        |
|        |                                          | ΔN 3-32,<br>ΔC 368-483,<br>ΔICL3 244-271          | R068S, M090V, Y227A, A282L, F327A,<br>F338M                      | C116L (exp.),<br>C358A (palm.)                                  |            |                 | VD     | 2Y00, 2Y01, 2Y02, 2Y03,<br>2Y04, 4AMI, 4AMJ, 4GPO,<br>3ZPR, 3ZPQ |                        |
|        |                                          | ΔN 3-32,<br>ΔC 368-483,<br>ΔICL3 244-271          | R068S, M090V, Y227A, A282L, F327A,<br>F338M, I129V, D322K, Y343L | C116L (exp.),<br>C358A (palm.)                                  |            |                 | LCP    | 4BVN                                                             |                        |
|        |                                          | ΔC 366-413                                        |                                                                  | N187E (N-gly)                                                   |            |                 | Fab5   | VD                                                               | 2R4R                   |
|        |                                          | ΔN 1-24,<br>ΔC 366-413                            |                                                                  | N187E (N-gly)                                                   |            |                 | Fab5   | VD                                                               | 2R4S                   |
|        |                                          | ΔC 366-413,<br>ΔICL3 234-259                      |                                                                  | N187E (N-glyc.)                                                 | T4L ICL3   |                 |        | LCP                                                              | 2RH1                   |
|        |                                          | ΔC 349-413,<br>ΔICL3 234-259                      | E122W                                                            | N187E (N-glyc.)                                                 | T4L ICL3   |                 |        | LCP                                                              | 3D4S, 3NY8, 3NY9, 3NYA |
|        |                                          | ΔC 366-413,<br>ΔICL3 234-259                      |                                                                  | N187E (N-glyc.)                                                 | T4L ICL3   | Nb80            |        | LCP                                                              | 3P0G                   |
|        |                                          | ΔN 1-23,<br>ΔC 349-413,<br>ΔICL3 234-259          |                                                                  | N187E (N-glyc.),<br>H93C (cov. lig.)                            | T4L ICL3   |                 |        | LCP                                                              | 3PDS                   |
|        |                                          | ΔN 1-28,<br>ΔC 366-413,<br>ΔICL3 235-263          |                                                                  | N187E (N-glyc.),<br>H93C (cov. lig.),<br>M96T (exp), M98T (exp) | T4L N-term | Nb6B9           |        | LCP                                                              | 4QKX                   |
|        | ΔN 1-28,<br>ΔC 366-413                   |                                                   | N187E (N-glyc.),<br>M96T (exp.), M98T (exp.)                     | T4L N-term                                                      | Nb35       |                 | LCP    | 3SN6                                                             |                        |
|        | ΔN 1-28,<br>ΔC 366-413,<br>ΔICL3 235-263 |                                                   | N187E (N-glyc.),<br>M96T (exp.), M98T (exp.)                     | T4L N-term                                                      |            |                 | LCP    | 4GBR                                                             |                        |
|        | ΔN 1-28,<br>ΔC 366-413,<br>ΔICL3 235-263 |                                                   | N187E (N-glyc.),<br>M96T (exp.), M98T (exp.)                     | T4L N-term                                                      | Nb6B9      |                 | LCP    | 4LDE, 4LDL, 4LDO                                                 |                        |

## Class A

| Family | Receptor                                           | Truncation                                                       | Stabilizing Mutations | Other Mutations                                            | Chimera   | Crystallization |        | PDB IDs                |
|--------|----------------------------------------------------|------------------------------------------------------------------|-----------------------|------------------------------------------------------------|-----------|-----------------|--------|------------------------|
|        |                                                    |                                                                  |                       |                                                            |           | Tool            | Method |                        |
| Amine  | <b>dopamine D3</b><br><i>human</i>                 | $\Delta$ ICL3 222-318                                            | L119W                 |                                                            | T4L ICL3  |                 | LCP    | 3PBL                   |
|        | <b>histamine 1</b><br><i>human</i>                 | $\Delta$ N 1-19,<br>$\Delta$ ICL3 222-404                        |                       |                                                            | T4L ICL3  |                 | LCP    | 3RZE                   |
|        | <b>serotonin 1B</b><br><i>human</i>                | $\Delta$ N 1-32,<br>$\Delta$ ICL3 240-305                        | L138W                 |                                                            | bRIL ICL3 |                 | LCP    | 4IAR                   |
|        |                                                    | $\Delta$ N 1-32,<br>$\Delta$ ICL3 240-303                        | L138W                 |                                                            | bRIL ICL3 |                 | LCP    | 4IAQ                   |
|        | <b>serotonin 2B</b><br><i>human</i>                | $\Delta$ N 1-35,<br>$\Delta$ C 406-481,<br>$\Delta$ ICL3 249-313 | M144W                 |                                                            | bRIL ICL3 |                 | LCP    | 4IB4, 4NC3             |
|        | <b>M2 muscarinic acetylcholine</b><br><i>human</i> | $\Delta$ ICL3 218-376                                            |                       | N2D (N-glyc.), N3D (N-glyc.), N6D (N-glyc.), N9D (N-glyc.) | T4L ICL3  |                 | LCP    | 3UON                   |
|        |                                                    | $\Delta$ ICL3 233-374                                            |                       | N2D (N-glyc.), N3D (N-glyc.), N6D (N-glyc.), N9D (N-glyc.) |           | Nb9-8           | LCP    | 4MQS, 4MQT             |
|        | <b>M3 muscarinic acetylcholine</b><br><i>rat</i>   | $\Delta$ N 1-56,<br>$\Delta$ ICL3 260-481                        |                       |                                                            | T4L ICL3  |                 | LCP    | 4DAJ, 4U14, 4U15, 4U16 |

## Class A

| Family         | Receptor                                     | Truncation                                                       | Stabilizing Mutations                                                                                                                                                                                                  | Other Mutations                       | Chimera            | Crystallization |        | PDB IDs    |
|----------------|----------------------------------------------|------------------------------------------------------------------|------------------------------------------------------------------------------------------------------------------------------------------------------------------------------------------------------------------------|---------------------------------------|--------------------|-----------------|--------|------------|
|                |                                              |                                                                  |                                                                                                                                                                                                                        |                                       |                    | Tool            | Method |            |
|                |                                              | $\Delta$ N 1-42,<br>$\Delta$ C 397-424,<br>$\Delta$ ICL3 269-299 | A86L, E166A, G215A, L310A, F358A, V360A                                                                                                                                                                                |                                       | T4L ICL3           |                 | LCP    | 4GRV       |
|                |                                              | $\Delta$ N 1-49,<br>$\Delta$ C 389-424,<br>$\Delta$ ICL3 280-295 | A86L, H103D, H105Y, A161V, R167L, R213L,<br>V234L, I253A, H305R, F358V, S362A                                                                                                                                          |                                       |                    |                 | VD     | 3ZEV       |
|                |                                              | $\Delta$ N 1-49,<br>$\Delta$ C 389-424,<br>$\Delta$ ICL3 273-290 | A86L, H103D, H105Y, A161V, R167L, R213L,<br>V234L, I253A, H305R, F358V, S362A                                                                                                                                          |                                       |                    |                 | VD     | 4BUO       |
|                | <b>neurotensin 1</b><br><i>rat</i>           | $\Delta$ N 1-49,<br>$\Delta$ C 389-424,<br>$\Delta$ ICL3 280-295 | S83G, A86L, T101R, H103D, H105Y, L119F,<br>M121L, E124D, L125V, R143K, D150E,<br>A161V, R167L, C172R, A177H, M208V,<br>R213L, V234L, V240L, I253A, N262R, K263R,<br>H305R, V313M, C332V, F342A, T354S,<br>F358V, S362A |                                       |                    |                 | VD     | 4BV0       |
| <b>Peptide</b> |                                              | $\Delta$ N 1-49,<br>$\Delta$ C 389-424,<br>$\Delta$ ICL3 280-295 | S83G, A86L, T101R, H103D, H105Y, L119F,<br>M121L, E124D, R143K, D150E, A161V,<br>R167L, R213L, V234L, K235R, V240L, I253A,<br>I260A, N262R, K263R, H305R, C332V,<br>F342A, T354S, F358V, S362A                         |                                       |                    |                 | VD     | 4BWB       |
|                | <b>angiotensin II type 1</b><br><i>human</i> | $\Delta$ N 1, 7-16<br>$\Delta$ C 320-359                         |                                                                                                                                                                                                                        |                                       | bRIL N-term        |                 | LCP    | 4YAY       |
|                | <b>chemokine CCR5</b><br><i>human</i>        | $\Delta$ C 320-352,<br>$\Delta$ ICL3 224-226                     | C58Y, G163N, A233D, K303E                                                                                                                                                                                              |                                       | Rubredoxin<br>ICL3 |                 | LCP    | 4MBS       |
|                |                                              | $\Delta$ C 326-352                                               | L125W                                                                                                                                                                                                                  |                                       | T4L ICL3           |                 | LCP    | 3OE6       |
|                |                                              | $\Delta$ C 320-352                                               | L125W                                                                                                                                                                                                                  |                                       | T4L ICL3           |                 | LCP    | 3ODU, 3OE8 |
|                | <b>chemokine CXCR4</b><br><i>human</i>       | $\Delta$ C 320-352, $\Delta$ ICL3<br>229-230                     | L125W                                                                                                                                                                                                                  | T240P (uncoup.)                       | T4L ICL3           |                 | LCP    | 3OE9, 3OE0 |
|                |                                              | $\Delta$ C 320-352,<br>$\Delta$ ICL3 229-230                     | L125W                                                                                                                                                                                                                  | T240P (uncoup.),<br>D187C (cov. lig.) | T4L ICL3           |                 | LCP    | 4RWS       |

## Class A

| Family  | Receptor                                          | Truncation                                                       | Stabilizing Mutations | Other Mutations                  | Chimera                | Crystallization |        | PDB IDs             |
|---------|---------------------------------------------------|------------------------------------------------------------------|-----------------------|----------------------------------|------------------------|-----------------|--------|---------------------|
|         |                                                   |                                                                  |                       |                                  |                        | Tool            | Method |                     |
| Peptide | <b><math>\delta</math>-opioid</b><br><i>mouse</i> | $\Delta$ N 1-35,<br>$\Delta$ C 343-372,<br>$\Delta$ ICL3 245-250 |                       |                                  | T4L ICL3               |                 | LCP    | 4EJ4                |
|         | <b><math>\delta</math>-opioid</b><br><i>human</i> | $\Delta$ N 1-35,<br>$\Delta$ C 339-372                           |                       | P37S (Xtal)                      | bRIL N-term            |                 | LCP    | 4N6H, 4RWA,<br>4RWD |
|         | <b><math>\kappa</math>-opioid</b><br><i>human</i> | $\Delta$ N 2-42,<br>$\Delta$ C 359-380,<br>$\Delta$ ICL3 S262    |                       | I135L (exp.)                     | T4L ICL3               |                 | LCP    | 4DJH                |
|         | <b><math>\mu</math>-opioid</b><br><i>mouse</i>    | $\Delta$ N 6-51,<br>$\Delta$ C 361-398,<br>$\Delta$ ICL3 264-269 |                       |                                  | T4L ICL3               |                 | LCP    | 4DKL                |
|         | <b>nociceptin/orphanin FQ</b><br><i>human</i>     | $\Delta$ N 1-43,<br>$\Delta$ C 341-370                           |                       |                                  | bRIL N-term            |                 | LCP    | 4EA3                |
|         | <b>PAR1</b><br><i>human</i>                       | $\Delta$ N 1-85,<br>$\Delta$ C 396-425,<br>$\Delta$ ICL3 V302    |                       | N250G (N-glyc.), N259S (N-glyc.) | T4L ICL3               |                 | LCP    | 3VW7                |
|         | <b>orexin 2</b><br><i>human</i>                   | $\Delta$ C 329-386,<br>$\Delta$ ICL3 255-293                     |                       |                                  | glycogen synthase ICL3 |                 | LCP    | 4S0V                |

## Class A

| Family            | Receptor                                       | Truncation                                   | Stabilizing Mutations                                   | Other Mutations | Chimera               | Crystallization |                                    | PDB IDs          |
|-------------------|------------------------------------------------|----------------------------------------------|---------------------------------------------------------|-----------------|-----------------------|-----------------|------------------------------------|------------------|
|                   |                                                |                                              |                                                         |                 |                       | Tool            | Method                             |                  |
| Nucleotide – like | <b>adenosine A2A</b><br><i>human</i>           | $\Delta$ C 317-412,<br>$\Delta$ ICL3 209-221 |                                                         |                 | T4L ICL3              |                 | LCP                                | 3EML, 3QAK       |
|                   |                                                | $\Delta$ C 317-412                           | L48A, A54L, T65A, Q89A                                  | N154A (N-glyc.) |                       | VD              | 2YDO, 2YDV                         |                  |
|                   |                                                | $\Delta$ C 317-412                           | A54L, T88A, R107A, K122A, L202A,<br>L235A, V239A, S277A | N154A (N-glyc.) |                       | VD              | 3PWH, 3REY,<br>3RFM, 3UZA,<br>3UZC |                  |
|                   |                                                | $\Delta$ C 317-412                           |                                                         | N154Q (N-glyc.) |                       | Fab2838         | VD                                 | 3VG9             |
|                   |                                                | $\Delta$ C 317-412,<br>$\Delta$ ICL3 210-217 |                                                         |                 | bRIL ICL3             |                 | LCP                                | 4E1Y             |
|                   | <b>purinergic P2Y1</b><br><i>human</i>         | $\Delta$ ICL3 248-252                        | D320N                                                   |                 | rubredoxin ICL3       |                 | LCP                                | 4XNV, 4XNW       |
|                   | <b>purinergic P2Y12</b><br><i>human</i>        |                                              | D294N                                                   |                 | bRIL ICL3             |                 | LCP                                | 4NTJ, 4PXZ, 4PY0 |
| Lipid             | <b>sphingosine-1-phosphate</b><br><i>human</i> | $\Delta$ C 327-382,<br>$\Delta$ ICL3 232-244 |                                                         |                 | T4L ICL3              |                 | LCP                                | 3V2W, 3V2Y       |
|                   | <b>GPR40/FFAR1</b><br><i>Human</i>             | $\Delta$ ICL3 211-212                        | L42A, F88A, G103A, Y202F                                |                 | T4L ICL3              |                 | LCP                                | 4PHU             |
|                   | <b>lysophosphatidic acid 1</b>                 | $\Delta$ C 326-364                           |                                                         |                 | bRIL ICL3             |                 | LCP                                | 4Z34, 4Z35       |
|                   |                                                | $\Delta$ C 326-364                           |                                                         |                 | D204C, V282C<br>(S-S) | bRIL ICL3       |                                    | LCP              |

Class A

| Family                            | Receptor                      | Truncation | Stabilizing Mutations | Other Mutations | Chimera | Crystallization |        | PDB IDs                                              |
|-----------------------------------|-------------------------------|------------|-----------------------|-----------------|---------|-----------------|--------|------------------------------------------------------|
|                                   |                               |            |                       |                 |         | Tool            | Method |                                                      |
| <b>Rhodopsin</b><br><i>bovine</i> | WT                            |            |                       |                 |         |                 | VD     | 1F88, 1HZX, 1L9H, 1U19, 1GZM, 2PED, 2G87, 2HPY, 3OAX |
|                                   |                               |            |                       |                 |         | Gta peptide     | VD     | 3PQR, 3PXO, 4J4Q                                     |
|                                   |                               |            |                       |                 |         | ArrFL-1 peptide | VD     | 4PFX                                                 |
|                                   | stabilized                    |            | N2C, D282C (S-S)      |                 |         |                 | VD     | 2J4Y                                                 |
|                                   | constitutively active mutants |            | N2C, D282C (S-S)      | E113Q (CAM)     |         | Gta peptide     | VD     | 2X72                                                 |
|                                   |                               |            | N2C, D282C (S-S)      | M257Y (CAM)     |         | Gta peptide     | VD     | 4A4M                                                 |
|                                   | disease mutants               |            | N2C, D282C (S-S)      | G90D (CAM)      |         |                 | VD     | 4BEZ                                                 |
|                                   |                               |            | N2C, D282C (S-S)      | G90D (CAM)      |         | Gta peptide     | VD     | 4BEY                                                 |
|                                   | opsin (apo)                   |            |                       |                 |         |                 | VD     | 3CAP                                                 |
|                                   | opsin (apo)                   |            |                       |                 |         | Gta peptide     | VD     | 3DQB                                                 |
| <b>Rhodopsin</b><br><i>squid</i>  | <i>squid</i>                  |            |                       |                 |         |                 | VD     | 2Z1Y, 2Z73, 3AYN, 3AYM                               |

NOTE: rhodopsin structures of poor resolution (> 3.5 Å; 2I35, 2I36, 2I37), and those obtained through reinterpretation of published data (3C9L, 3C9M) are not included in the table.

## Class B

| Receptor                                                | Truncation                                                        | Stabilizing Mutations                                                          | Other Mutations | Chimera | Crystallization |        | PDB IDs |
|---------------------------------------------------------|-------------------------------------------------------------------|--------------------------------------------------------------------------------|-----------------|---------|-----------------|--------|---------|
|                                                         |                                                                   |                                                                                |                 |         | Tool            | Method |         |
| <b>glucagon</b><br><i>human</i>                         | $\Delta$ N 1-122,<br>$\Delta$ C 433-477                           |                                                                                |                 |         | bRIL N-term     | LCP    | 4L6R    |
| <b>corticotropin-releasing factor 1</b><br><i>human</i> | $\Delta$ N 1-103,<br>$\Delta$ C 374-444,<br>$\Delta$ ICL2 221-223 | V120A, L144A, W156A, S160A, K228A, F260A,<br>I277A, Y309A, F330A, S349A, Y363A |                 |         | T4L ICL2        | LCP    | 4K5Y    |

## Class C

| Receptor                                             | Truncation                               | Stabilizing Mutations                    | Other Mutations | Chimera | Crystallization |        | PDB IDs |
|------------------------------------------------------|------------------------------------------|------------------------------------------|-----------------|---------|-----------------|--------|---------|
|                                                      |                                          |                                          |                 |         | Tool            | Method |         |
| <b>metabotropic glutamate type 1</b><br><i>human</i> | $\Delta$ N 1-580,<br>$\Delta$ C 861-1194 |                                          |                 |         | bRIL N-term     | LCP    | 4OR2    |
| <b>metabotropic glutamate type 5</b><br><i>human</i> | $\Delta$ N 2-568,<br>$\Delta$ C 837-1153 | E579A, N667Y, I669A, G675M, T742A, S753A |                 |         | T4L ICL2        | LCP    | 4O09    |

## Smoothened

| Receptor                          | Truncation                                                        | Stabilizing Mutations | Other Mutations | Chimera | Crystallization |        | PDB IDs             |
|-----------------------------------|-------------------------------------------------------------------|-----------------------|-----------------|---------|-----------------|--------|---------------------|
|                                   |                                                                   |                       |                 |         | Tool            | Method |                     |
| <b>smoothened</b><br><i>human</i> | $\Delta$ N 1-189,<br>$\Delta$ C 556-787                           |                       |                 |         | bRIL N-term     | LCP    | 4JKV, 4N4W          |
|                                   | $\Delta$ N 1-189,<br>$\Delta$ C 556-787,<br>$\Delta$ ICL3 434-440 |                       |                 |         | bRIL ICL3       | LCP    | 4O9R, 4QIM,<br>4QIN |



Viral GPCRs

| Receptor                                              | Truncation                            | Stabilizing Mutations | Other Mutations | Chimera | Crystallization |        | PDB IDs |
|-------------------------------------------------------|---------------------------------------|-----------------------|-----------------|---------|-----------------|--------|---------|
|                                                       |                                       |                       |                 |         | Tool            | Method |         |
| <b>chemokine US28</b><br><i>human cytomegalovirus</i> | $\Delta$ N 1-9,<br>$\Delta$ C 310-354 |                       |                 |         |                 | LCP    | 4XT3    |
|                                                       |                                       |                       |                 |         | Nb7             | LCP    | 4XT1    |

**Supplementary Table 2.** Ligand and mutagenesis data for selected GPCRs. Ligand data include the number of ligands found in the ChEMBLdb for each receptor (and how many of those are similar to the co-crystallized ligands). Mutation data include the number of ligands used in mutagenesis studies, the number of mutants and positions mutated, and the combination of mutants and ligands. See the footnotes for details.

| GPCR                       | Ligand data                                                                         |                                                                                                                                                                                                                          |                                                   | Mutagenesis data                                                                    |                                                    |                                          |
|----------------------------|-------------------------------------------------------------------------------------|--------------------------------------------------------------------------------------------------------------------------------------------------------------------------------------------------------------------------|---------------------------------------------------|-------------------------------------------------------------------------------------|----------------------------------------------------|------------------------------------------|
|                            | chemical structure <sup>a</sup>                                                     | name <sup>b</sup> : PDBid                                                                                                                                                                                                | # total <sup>c</sup><br>[# similar <sup>d</sup> ] | # of ligands in<br>mutagenesis<br>studies<br>[# of protein<br>ligands] <sup>e</sup> | #mutants <sup>f</sup><br>[positions <sup>g</sup> ] | #mutant-<br>ligand<br>comb. <sup>h</sup> |
| <b>Aminergic receptors</b> |                                                                                     |                                                                                                                                                                                                                          |                                                   |                                                                                     |                                                    |                                          |
| $\beta_1$ AR               | 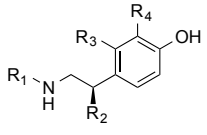   | isoproterenol: 2Y03 <sup>1</sup><br>salbutamol: 2Y04 <sup>1</sup><br>dobutamine: 2Y00/2Y01 <sup>1</sup><br>carmoterol: 2Y02 <sup>1</sup>                                                                                 | 1191<br>[106]                                     | 19                                                                                  | 33<br>[27]                                         | 149 <sup>2</sup>                         |
|                            |    | Carazolol: 2YCW <sup>3</sup><br>Carvedilol: 4AMJ <sup>4</sup><br>Bucindolol: 4AMI <sup>4</sup><br>Cyanopindolol: 2VT4 <sup>5</sup> /<br>2YCX <sup>3</sup> /2YCY <sup>3</sup> /4BVN <sup>5</sup><br>l-cyanopindolol: 2YCZ |                                                   |                                                                                     |                                                    |                                          |
|                            |   | arylpiperazine 19: 3ZPQ <sup>6</sup><br>arylpiperazine 20: 3ZPR <sup>6</sup>                                                                                                                                             |                                                   |                                                                                     |                                                    |                                          |
| $\beta_2$ AR               |  | epinephrine: 4LDO <sup>7</sup><br>hydrox.bnz.isopr.:4LDL <sup>Z</sup><br>BI-167107:<br>3P0G <sup>8</sup> /3SN6 <sup>9</sup> /4LDE <sup>Z</sup><br>FAUC50: 3PDS<br>4QKS <sup>10</sup>                                     | 1352<br>[187]                                     | 39                                                                                  | 171<br>[91]                                        | 298 <sup>2</sup>                         |
|                            |  | alprenolol: 3NYA <sup>11</sup><br>carazolol: 2RH1 <sup>12</sup> /4GBR<br>VS hit: 3NY9 <sup>11</sup><br>ICI-118,551: 3NY8 <sup>11</sup>                                                                                   |                                                   |                                                                                     |                                                    |                                          |
|                            |  | timolol: 3D4S <sup>13</sup>                                                                                                                                                                                              |                                                   |                                                                                     |                                                    |                                          |
| D <sub>3</sub> R           |  | eticlopride: 3PBL <sup>14</sup>                                                                                                                                                                                          | 2668<br>[18]                                      | 31                                                                                  | 20 [18]                                            | 144 <sup>2</sup>                         |
| M <sub>2</sub>             |  | (R)-3-quinuclidinyl<br>benzilate: 4MQS <sup>15</sup>                                                                                                                                                                     | 1546<br>[43]                                      | 38                                                                                  | 41 [32] <sup>2</sup>                               | 207 <sup>2</sup>                         |
|                            |  | LY2119620: 4MQT <sup>16</sup>                                                                                                                                                                                            |                                                   |                                                                                     |                                                    |                                          |
|                            |  | iperoxo: 4MQT <sup>16</sup>                                                                                                                                                                                              |                                                   |                                                                                     |                                                    |                                          |

|                            |                                                                                     |                                                                                                        |                  |            |           |                       |
|----------------------------|-------------------------------------------------------------------------------------|--------------------------------------------------------------------------------------------------------|------------------|------------|-----------|-----------------------|
| M <sub>3</sub>             | 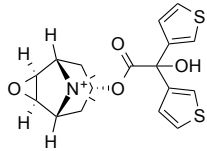   | <u>tiotropium</u> : 4DAJ <sup>17</sup> /<br>4U14 <sup>18</sup> /4U15 <sup>18</sup> /4U16 <sup>18</sup> | 1385<br>[15]     | 24         | 68 [55]   | 224 <sup>2</sup>      |
| H <sub>1</sub> R           |    | <u>doxepin</u> : 3RZE <sup>19</sup>                                                                    | 1201<br>[5]      | 31         | 28 [16]   | 238 <sup>2</sup>      |
| 5HT <sub>1B</sub>          |    | <u>ergotamine</u> : 4IAR <sup>20,21</sup><br><br><u>dihydroergotamine</u> :<br>4IAQ <sup>20,21</sup>   | 1040<br>[2/253]  | 18         | 37 [23]   | 124 <sup>21-23</sup>  |
| 5HT <sub>2B</sub>          |    | <u>ergotamine</u> : 4IB4 <sup>20,21</sup>                                                              | 1104<br>[11/64]☆ | 6          | 20 [20]   | 63 <sup>21-23</sup>   |
| <b>Chemokine receptors</b> |                                                                                     |                                                                                                        |                  |            |           |                       |
| CCR5                       |   | <u>Maraviroc</u> : 4MBS <sup>24</sup>                                                                  | 1793<br>[96]     | 26 [15]    | 148 [103] | 1048 <sup>25,26</sup> |
| CXCR4                      |  | 1T1t: 3ODU <sup>24</sup>                                                                               | 166<br>[18]      | 35<br>[19] | 112 [86]  | 583 <sup>25,27</sup>  |
|                            | Peptide <sup>a</sup>                                                                | CVX15: 3OE0/3OE6/<br>3OE8/3OE9 <sup>28</sup>                                                           |                  |            |           |                       |
|                            | Chemokine <sup>a</sup>                                                              | vMIP-II: 4RWS <sup>29</sup>                                                                            |                  |            |           |                       |

| Opioid receptors    |                                                                                     |                                                                                                            |               |    |                          |                      |
|---------------------|-------------------------------------------------------------------------------------|------------------------------------------------------------------------------------------------------------|---------------|----|--------------------------|----------------------|
| OPRD                | 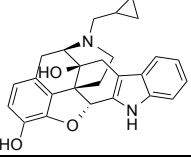   | <u>naltrindole</u> : 4EJ4 <sup>31</sup> /4N6H <sup>32</sup>                                                | 2461<br>[333] | 44 | 67 [45] <sup>23,32</sup> | 340 <sup>23,32</sup> |
|                     |    | PRD_001256:<br>4RWA/4RWD <sup>33</sup>                                                                     |               |    |                          |                      |
| OPRM                |    | $\beta$ -funaltrexamine: 4DKL <sup>34</sup>                                                                | 2678<br>[198] | 35 | 35 [25]                  | 133 <sup>23</sup>    |
| OPRK                |    | <u>JDtic</u> : 4DJH <sup>35</sup>                                                                          | 2755<br>[37]  | 26 | 45 [37]                  | 119 <sup>23,35</sup> |
| OPRX                |   | <u>NEQ</u> : 4EA3 <sup>36</sup>                                                                            | 1078 [20]     | 25 | 12 [12]                  | 48 <sup>23,36</sup>  |
| Adenosine receptors |                                                                                     |                                                                                                            |               |    |                          |                      |
| A <sub>2A</sub> R   |  | <u>Adenosine</u> : 2YDO <sup>37</sup><br><u>NECA</u> : 2YDV <sup>37</sup><br>UK-432097: 3QAK <sup>38</sup> | 3447<br>[556] | 71 | 48 [32]                  | 473 <sup>39</sup>    |
|                     |  | <u>ZM241385</u> : 3EML <sup>40</sup> /<br>3PWH <sup>41</sup> /3VG9 <sup>42</sup> /3VGA <sup>42</sup>       |               |    |                          |                      |
|                     |  | XAC: 3REY <sup>41</sup><br>caffeine: 3RFM <sup>41</sup>                                                    |               |    |                          |                      |
|                     |  | <u>1,2,4-triazine 4g</u> : 3UZA <sup>43</sup><br><u>1,2,4-triazine 4e</u> : 3UZC <sup>43</sup>             |               |    |                          |                      |

| Purinergic receptors           |                                                                                     |                                                            |              |          |         |                        |
|--------------------------------|-------------------------------------------------------------------------------------|------------------------------------------------------------|--------------|----------|---------|------------------------|
| P <sub>2</sub> Y <sub>12</sub> | 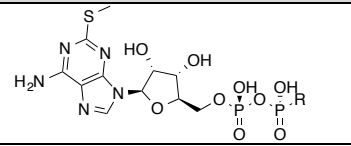   | 2MeSADP: 4PXZ <sup>46</sup><br>2MeSATP: 4PYO <sup>46</sup> | 906<br>[92]  | 3        | 10 [10] | 12 <sup>39,46,47</sup> |
|                                |    | AZD1283: 4NTJ <sup>47</sup>                                |              |          |         |                        |
| P <sub>2</sub> Y <sub>1</sub>  |    | MRS2500: 4XNW <sup>48</sup>                                | 301<br>[191] | 4        | 53 [31] | 97 <sup>39,48</sup>    |
|                                |    | BPTU: 4XNV <sup>48</sup>                                   |              |          |         |                        |
| Proteinase-activated receptors |                                                                                     |                                                            |              |          |         |                        |
| PAR1                           |   | Vorapaxar: 3VW7 <sup>49</sup>                              | 574<br>[236] | 1        | 3 [3]   | 5 <sup>49</sup>        |
| Lipid receptors                |                                                                                     |                                                            |              |          |         |                        |
| S1P1                           |  | ML056: 3V2W <sup>50</sup> /3V2Y <sup>50</sup>              | 1241<br>[32] | 14       | 53 [27] | 115 <sup>50,51</sup>   |
| FFAR1                          |  | TAK-875: 4PHU <sup>44</sup>                                | 539<br>[71]  | 7        | 15 [10] | 47 <sup>44,45</sup>    |
| Neurotensin receptors          |                                                                                     |                                                            |              |          |         |                        |
| NTR1                           | Peptide <sup>a</sup>                                                                | NTS(8-13);<br>4GRV <sup>50</sup> /3ZEV <sup>52</sup>       | 253          | 7<br>[3] | 56 [50] | 131 <sup>23</sup>      |
| Orexin receptors               |                                                                                     |                                                            |              |          |         |                        |
| OX2R                           |  | Suvorexant: 4S0V <sup>53</sup>                             | 576<br>[52]  | 7<br>[3] | 22 [21] | 118                    |

| Secretin-like receptors          |                                                                                     |                                         |                           |                        |           |                        |
|----------------------------------|-------------------------------------------------------------------------------------|-----------------------------------------|---------------------------|------------------------|-----------|------------------------|
| CRF <sub>1</sub>                 | 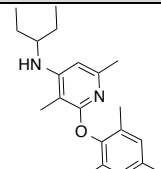   | <u>CP-376395</u> : 4K5Y <sup>54</sup>   | 1404<br>[6]               | 20<br>[11]             | 185 [170] | 289 <sup>54-56</sup>   |
| GCGR                             | -                                                                                   | 4L6R <sup>i</sup> 57                    | 710                       | 6<br>[5] <sup>57</sup> | 217 [145] | 260 <sup>55</sup>      |
| Metabotropic glutamate receptors |                                                                                     |                                         |                           |                        |           |                        |
| mGluR1                           |    | <u>FITM</u> : 4OR2 <sup>j</sup> 58      | 476<br>[22] <sup>l</sup>  | 12                     | 37 [26]   | 90 <sup>x</sup> 59,60  |
| mGluR5                           |    | mavoglurant: 4OO9 <sup>i</sup> 60       | 1415<br>[32] <sup>l</sup> | 16                     | 70 [33]   | 253 <sup>59,60</sup>   |
| Frizzled receptors               |                                                                                     |                                         |                           |                        |           |                        |
| SMO                              |   | <u>LY2940680</u> : 4JKV <sup>61</sup>   | 355<br>[32]               | 16                     | 13 [12]   | 58 <sup>60,62,63</sup> |
|                                  |  | <u>ANTA XV</u> : 4QIM <sup>63</sup>     |                           |                        |           |                        |
|                                  |  | <u>SAG1.5</u> : 4QIN <sup>63</sup>      |                           |                        |           |                        |
|                                  |  | <u>SANT-1</u> : 4N4W <sup>63</sup>      |                           |                        |           |                        |
|                                  |  | <u>cyclopamine</u> : 4O9R <sup>63</sup> |                           |                        |           |                        |

a) Conserved scaffolds are shown for ligand series of  $\beta_1$ ,  $\beta_2$ , 5HT<sub>1B</sub>, and A2A, while molecular structures of large co-crystallized polypeptide/protein ligands of CXCR4, US28, and NTR1 are not displayed; parts of the ligands with high B-factors are colored red;

b) Co-crystallized ligands that have been investigated in mutation studies are underlined (mutation data extracted from GPCRDB and indicated references);

c) Ligands (60 heavy atoms or lower) extracted from ChEMBLdb with binding affinity ( $IC_{50}/K_i$ ) or functional potency ( $IC_{50}/EC_{50}$ ) of at least 10  $\mu$ M;

d) Number of ligands with ECFP-4 Tanimoto similarity  $\geq 0.4$  to a co-crystallized ligand of the corresponding receptor;

e) Number of unique ligands studied in mutation studies, protein ligands (60 heavy atoms or higher) indicated between brackets;

f) Number of unique mutants investigated in mutation studies;

g) Number of unique residue positions investigated in mutation studies;

h) Number of investigated combinations of mutants and ligands (mutation data extracted from GPCRDB and/or indicated references);

i) Similarity assessment only with co-crystallized ligands in 7TM domain (not ECD).

## References

1. Warne, T.; Moukhametzianov, R.; Baker, J. G.; Nehme, R.; Edwards, P. C.; Leslie, A. G.; Schertler, G. F.; Tate, C. G. The structural basis for agonist and partial agonist action on a beta(1)-adrenergic receptor. *Nature* **2011**, *469*, 241-4.
2. Kooistra, A. J.; Kuhne, S.; de Esch, I. J. P.; Leurs, R.; de Graaf, C. A structural chemogenomics analysis of aminergic GPCRs: lessons for histamine receptor ligand design. *Br J Pharmacol* **2013**.
3. Moukhametzianov, R.; Warne, T.; Edwards, P. C.; Serrano-Vega, M. J.; Leslie, A. G.; Tate, C. G.; Schertler, G. F. Two distinct conformations of helix 6 observed in antagonist-bound structures of a beta1-adrenergic receptor. *Proceedings of the National Academy of Sciences of the United States of America* **2011**, *108*, 8228-32.
4. Warne, T.; Edwards, P. C.; Leslie, A. G.; Tate, C. G. Crystal structures of a stabilized beta1-adrenoceptor bound to the biased agonists bucindolol and carvedilol. *Structure* **2012**, *20*, 841-9.
5. Miller-Gallacher, J. L.; Nehme, R.; Warne, T.; Edwards, P. C.; Schertler, G. F.; Leslie, A. G.; Tate, C. G. The 2.1 Å Resolution Structure of Cyanopindolol-Bound beta1-Adrenoceptor Identifies an Intramembrane Na<sup>+</sup> Ion that Stabilises the Ligand-Free Receptor. *PLoS One* **2014**, *9*, e92727.
6. Christopher, J. A.; Brown, J.; Dore, A. S.; Errey, J. C.; Koglin, M.; Marshall, F. H.; Myszk, D. G.; Rich, R. L.; Tate, C. G.; Tehan, B.; Warne, T.; Congreve, M. Biophysical fragment screening of the beta1-adrenergic receptor: identification of high affinity arylpiperazine leads using structure-based drug design. *Journal of Medicinal Chemistry* **2013**, *56*, 3446-55.
7. Ring, A. M.; Manglik, A.; Kruse, A. C.; Enos, M. D.; Weis, W. I.; Garcia, K. C.; Kobilka, B. K. Adrenaline-activated structure of beta-adrenoceptor stabilized by an engineered nanobody. *Nature* **2013**.
8. Rasmussen, S. G.; Choi, H. J.; Fung, J. J.; Pardon, E.; Casarosa, P.; Chae, P. S.; Devree, B. T.; Rosenbaum, D. M.; Thian, F. S.; Kobilka, T. S.; Schnapp, A.; Konetzki, I.; Sunahara, R. K.; Gellman, S. H.; Pautsch, A.; Steyaert, J.; Weis, W. I.; Kobilka, B. K. Structure of a nanobody-stabilized active state of the beta(2) adrenoceptor. *Nature* **2011**, *469*, 175-80.
9. Rasmussen, S. G.; DeVree, B. T.; Zou, Y.; Kruse, A. C.; Chung, K. Y.; Kobilka, T. S.; Thian, F. S.; Chae, P. S.; Pardon, E.; Calinski, D.; Mathiesen, J. M.; Shah, S. T.; Lyons, J. A.; Caffrey, M.; Gellman, S. H.; Steyaert, J.; Skiniotis, G.; Weis, W. I.; Sunahara, R. K.; Kobilka, B. K. Crystal structure of the beta2 adrenergic receptor-Gs protein complex. *Nature* **2011**, *477*, 549-55.
10. Weichert, D.; Kruse, A. C.; Manglik, A.; Hiller, C.; Zhang, C.; Hubner, H.; Kobilka, B. K.; Gmeiner, P. Covalent agonists for studying G protein-coupled receptor activation. *Proceedings of the National Academy of Sciences of the United States of America* **2014**, *111*, 10744-8.
11. Wacker, D.; Fenalti, G.; Brown, M. A.; Katritch, V.; Abagyan, R.; Cherezov, V.; Stevens, R. C. Conserved binding mode of human beta2 adrenergic receptor inverse agonists and antagonist revealed by X-ray crystallography. *Journal of the American Chemical Society* **2010**, *132*, 11443-5.
12. Cherezov, V.; Rosenbaum, D. M.; Hanson, M. A.; Rasmussen, S. G.; Thian, F. S.; Kobilka, T. S.; Choi, H. J.; Kuhn, P.; Weis, W. I.; Kobilka, B. K.; Stevens, R. C. High-resolution crystal structure of an engineered human beta2-adrenergic G protein-coupled receptor. *Science* **2007**, *318*, 1258-65.
13. Hanson, M. A.; Cherezov, V.; Griffith, M. T.; Roth, C. B.; Jaakola, V. P.; Chien, E. Y.; Velasquez, J.; Kuhn, P.; Stevens, R. C. A specific cholesterol binding site is established by the 2.8 Å structure of the human beta2-adrenergic receptor. *Structure* **2008**, *16*, 897-905.
14. Chien, E. Y.; Liu, W.; Zhao, Q.; Katritch, V.; Han, G. W.; Hanson, M. A.; Shi, L.; Newman, A. H.; Javitch, J. A.; Cherezov, V.; Stevens, R. C. Structure of the human dopamine D3 receptor in complex with a D2/D3 selective antagonist. *Science* **2010**, *330*, 1091-5.
15. Haga, K.; Kruse, A. C.; Asada, H.; Yurugi-Kobayashi, T.; Shiroishi, M.; Zhang, C.; Weis, W. I.; Okada, T.; Kobilka, B. K.; Haga, T.; Kobayashi, T. Structure of the human M2 muscarinic acetylcholine receptor bound to an antagonist. *Nature* **2012**, *482*, 547-51.
16. Kruse, A. C.; Ring, A. M.; Manglik, A.; Hu, J.; Hu, K.; Eitel, K.; Hubner, H.; Pardon, E.; Valant, C.; Sexton, P. M.; Christopoulos, A.; Felder, C. C.; Gmeiner, P.; Steyaert, J.; Weis, W. I.; Garcia, K. C.; Wess, J.; Kobilka, B. K. Activation and allosteric modulation of a muscarinic acetylcholine receptor. *Nature* **2013**, *504*, 101-6.
17. Kruse, A. C.; Hu, J.; Pan, A. C.; Arlow, D. H.; Rosenbaum, D. M.; Rosemond, E.; Green, H. F.; Liu, T.; Chae, P. S.; Dror, R. O.; Shaw, D. E.; Weis, W. I.; Wess, J.; Kobilka, B. K. Structure and dynamics of the M3 muscarinic acetylcholine receptor. *Nature* **2012**, *482*, 552-6.
18. Thorsen, T. S.; Matt, R.; Weis, W. I.; Kobilka, B. K. Modified T4 Lysozyme Fusion Proteins Facilitate G Protein-Coupled Receptor Crystallogenesis. *Structure* **2014**, *22*, 1657-1664.
19. Shimamura, T.; Shiroishi, M.; Weyand, S.; Tsujimoto, H.; Winter, G.; Katritch, V.; Abagyan, R.; Cherezov, V.; Liu, W.; Han, G. W.; Kobayashi, T.; Stevens, R. C.; Iwata, S. Structure of the human histamine H1 receptor complex with doxepin. *Nature* **2011**, *475*, 65-70.
20. Wacker, D.; Wang, C.; Katritch, V.; Han, G. W.; Huang, X. P.; Vardy, E.; McCorvy, J. D.; Jiang, Y.; Chu, M.; Siu, F. Y.; Liu, W.; Xu, H. E.; Cherezov, V.; Roth, B. L.; Stevens, R. C. Structural features for functional selectivity at serotonin receptors. *Science* **2013**, *340*, 615-9.
21. Wang, C.; Jiang, Y.; Ma, J.; Wu, H.; Wacker, D.; Katritch, V.; Han, G. W.; Liu, W.; Huang, X. P.; Vardy, E.; McCorvy, J. D.; Gao, X.; Zhou, X. E.; Melcher, K.; Zhang, C.; Bai, F.; Yang, H.; Yang, L.; Jiang, H.; Roth, B. L.; Cherezov, V.; Stevens, R. C.; Xu, H. E. Structural basis for molecular recognition at serotonin receptors. *Science* **2013**, *340*, 610-4.
22. Shi, L.; Javitch, J. A. The binding site of aminergic G protein-coupled receptors: the transmembrane segments and second extracellular loop. *Annu Rev Pharmacol Toxicol* **2002**, *42*, 437-67.
23. Isberg, V.; Vroiling, B.; van der Kant, R.; Li, K.; Vriend, G.; Gloriam, D. GPCRDB: an information system for G protein-coupled receptors. *Nucleic Acids Res* **2014**, *42*, D422-5.



24. Tan, Q.; Zhu, Y.; Li, J.; Chen, Z.; Han, G. W.; Kufareva, I.; Li, T.; Ma, L.; Fenalti, G.; Zhang, W.; Xie, X.; Yang, H.; Jiang, H.; Cherezov, V.; Liu, H.; Stevens, R. C.; Zhao, Q.; Wu, B. Structure of the CCR5 chemokine receptor-HIV entry inhibitor maraviroc complex. *Science* **2013**, *341*, 1387-90.
25. Scholten, D. J.; Canals, M.; Maussang, D.; Roumen, L.; Smit, M. J.; Wijnmans, M.; de Graaf, C.; Vischer, H. F.; Leurs, R. Pharmacological modulation of chemokine receptor function. *Br J Pharmacol* **2012**, *165*, 1617-43.
26. Garcia-Perez, J.; Rueda, P.; Alcamí, J.; Rognan, D.; Arenzana-Seisdedos, F.; Lagane, B.; Kellenberger, E. Allosteric model of maraviroc binding to CC chemokine receptor 5 (CCR5). *J Biol Chem* **2011**, *286*, 33409-21.
27. Kufareva, I.; Salanga, C. L.; Handel, T. M. Chemokine and chemokine receptor structure and interactions: implications for therapeutic strategies. *Immunol Cell Biol* **2015**.
28. Wu, B.; Chien, E. Y.; Mol, C. D.; Fenalti, G.; Liu, W.; Katritch, V.; Abagyan, R.; Brooun, A.; Wells, P.; Bi, F. C.; Hamel, D. J.; Kuhn, P.; Handel, T. M.; Cherezov, V.; Stevens, R. C. Structures of the CXCR4 chemokine GPCR with small-molecule and cyclic peptide antagonists. *Science* **2010**, *330*, 1066-71.
29. Qin, L.; Kufareva, I.; Holden, L. G.; Wang, C.; Zheng, Y.; Zhao, C.; Fenalti, G.; Wu, H.; Han, G. W.; Cherezov, V.; Abagyan, R.; Stevens, R. C.; Handel, T. M. Structural biology. Crystal structure of the chemokine receptor CXCR4 in complex with a viral chemokine. *Science* **2015**, *347*, 1117-22.
30. Burg, J. S.; Ingram, J. R.; Venkatakrishnan, A. J.; Jude, K. M.; Dukkipati, A.; Feinberg, E. N.; Angelini, A.; Waghray, D.; Dror, R. O.; Ploegh, H. L.; Garcia, K. C. Structural biology. Structural basis for chemokine recognition and activation of a viral G protein-coupled receptor. *Science* **2015**, *347*, 1113-7.
31. Granier, S.; Manglik, A.; Kruse, A. C.; Kobilka, T. S.; Thian, F. S.; Weis, W. I.; Kobilka, B. K. Structure of the delta-opioid receptor bound to naltrindole. *Nature* **2012**, *485*, 400-4.
32. Fenalti, G.; Giguere, P. M.; Katritch, V.; Huang, X. P.; Thompson, A. A.; Cherezov, V.; Roth, B. L.; Stevens, R. C. Molecular control of delta-opioid receptor signalling. *Nature* **2014**, *506*, 191-6.
33. Fenalti, G.; Zatsel, N. A.; Betti, C.; Giguere, P.; Han, G. W.; Ishchenko, A.; Liu, W.; Guillemyn, K.; Zhang, H.; James, D.; Wang, D.; Weierstall, U.; Spence, J. C.; Boutet, S.; Messerschmidt, M.; Williams, G. J.; Gati, C.; Yefanov, O. M.; White, T. A.; Oberthuer, D.; Metz, M.; Yoon, C. H.; Barty, A.; Chapman, H. N.; Basu, S.; Coe, J.; Conrad, C. E.; Fromme, R.; Fromme, P.; Tourwe, D.; Schiller, P. W.; Roth, B. L.; Ballet, S.; Katritch, V.; Stevens, R. C.; Cherezov, V. Structural basis for bifunctional peptide recognition at human delta-opioid receptor. *Nat Struct Mol Biol* **2015**, *22*, 265-8.
34. Manglik, A.; Kruse, A. C.; Kobilka, T. S.; Thian, F. S.; Mathiesen, J. M.; Sunahara, R. K.; Pardo, L.; Weis, W. I.; Kobilka, B. K.; Granier, S. Crystal structure of the micro-opioid receptor bound to a morphinan antagonist. *Nature* **2012**, *485*, 321-6.
35. Wu, H.; Wacker, D.; Mileni, M.; Katritch, V.; Han, G. W.; Vardy, E.; Liu, W.; Thompson, A. A.; Huang, X. P.; Carroll, F. I.; Mascarella, S. W.; Westkaemper, R. B.; Mosier, P. D.; Roth, B. L.; Cherezov, V.; Stevens, R. C. Structure of the human kappa-opioid receptor in complex with JDTic. *Nature* **2012**, *485*, 327-32.
36. Thompson, A. A.; Liu, W.; Chun, E.; Katritch, V.; Wu, H.; Vardy, E.; Huang, X. P.; Trapella, C.; Guerrini, R.; Calo, G.; Roth, B. L.; Cherezov, V.; Stevens, R. C. Structure of the nociceptin/orphanin FQ receptor in complex with a peptide mimetic. *Nature* **2012**, *485*, 395-9.
37. Lebon, G.; Warne, T.; Edwards, P. C.; Bennett, K.; Langmead, C. J.; Leslie, A. G.; Tate, C. G. Agonist-bound adenosine A2A receptor structures reveal common features of GPCR activation. *Nature* **2011**, *474*, 521-5.
38. Xu, F.; Wu, H.; Katritch, V.; Han, G. W.; Jacobson, K. A.; Gao, Z. G.; Cherezov, V.; Stevens, R. C. Structure of an agonist-bound human A2A adenosine receptor. *Science* **2011**, *332*, 322-7.
39. Jacobson, K. A.; Costanzi, S.; Deflorian, F. Probing GPCR structure: adenosine and P2Y nucleotide receptors. *Methods Enzymol* **2013**, *520*, 199-217.
40. Jaakola, V. P.; Griffith, M. T.; Hanson, M. A.; Cherezov, V.; Chien, E. Y.; Lane, J. R.; Ijzerman, A. P.; Stevens, R. C. The 2.6 angstrom crystal structure of a human A2A adenosine receptor bound to an antagonist. *Science* **2008**, *322*, 1211-7.
41. Dore, A. S.; Robertson, N.; Errey, J. C.; Ng, I.; Hollenstein, K.; Tehan, B.; Hurrell, E.; Bennett, K.; Congreve, M.; Magnani, F.; Tate, C. G.; Weir, M.; Marshall, F. H. Structure of the adenosine A(2A) receptor in complex with ZM241385 and the xanthines XAC and caffeine. *Structure* **2011**, *19*, 1283-93.
42. Hino, T.; Arakawa, T.; Iwanari, H.; Yurugi-Kobayashi, T.; Ikeda-Suno, C.; Nakada-Nakura, Y.; Kusano-Arai, O.; Weyand, S.; Shimamura, T.; Nomura, N.; Cameron, A. D.; Kobayashi, T.; Hamakubo, T.; Iwata, S.; Murata, T. G-protein-coupled receptor inactivation by an allosteric inverse-agonist antibody. *Nature* **2012**, *482*, 237-40.
43. Congreve, M.; Andrews, S. P.; Dore, A. S.; Hollenstein, K.; Hurrell, E.; Langmead, C. J.; Mason, J. S.; Ng, I. W.; Tehan, B.; Zhukov, A.; Weir, M.; Marshall, F. H. Discovery of 1,2,4-triazine derivatives as adenosine A(2A) antagonists using structure based drug design. *J Med Chem* **2012**, *55*, 1898-903.
44. Srivastava, A.; Yano, J.; Hirozane, Y.; Kefala, G.; Gruswitz, F.; Snell, G.; Lane, W.; Ivetac, A.; Aertgeerts, K.; Nguyen, J.; Jennings, A.; Okada, K. High-resolution structure of the human GPR40 receptor bound to allosteric agonist TAK-875. *Nature* **2014**, *513*, 124-7.
45. Tikhonova, I. G.; Sum, C. S.; Neumann, S.; Engel, S.; Raaka, B. M.; Costanzi, S.; Gershengorn, M. C. Discovery of novel agonists and antagonists of the free fatty acid receptor 1 (FFAR1) using virtual screening. *J Med Chem* **2008**, *51*, 625-33.
46. Zhang, J.; Zhang, K.; Gao, Z. G.; Paoletta, S.; Zhang, D.; Han, G. W.; Li, T.; Ma, L.; Zhang, W.; Muller, C. E.; Yang, H.; Jiang, H.; Cherezov, V.; Katritch, V.; Jacobson, K. A.; Stevens, R. C.; Wu, B.; Zhao, Q. Agonist-bound structure of the human P2Y12 receptor. *Nature* **2014**, *509*, 119-22.
47. Zhang, K.; Zhang, J.; Gao, Z. G.; Zhang, D.; Zhu, L.; Han, G. W.; Moss, S. M.; Paoletta, S.; Kiselev, E.; Lu, W.; Fenalti, G.; Zhang, W.; Muller, C. E.; Yang, H.; Jiang, H.; Cherezov, V.; Katritch, V.; Jacobson, K. A.; Stevens, R. C.; Wu, B.; Zhao, Q. Structure of the human P2Y12 receptor in complex with an antithrombotic drug. *Nature* **2014**, *509*, 115-8.
48. Zhang, D.; Gao, Z. G.; Zhang, K.; Kiselev, E.; Crane, S.; Wang, J.; Paoletta, S.; Yi, C.; Ma, L.; Zhang, W.; Han, G. W.; Liu, H.; Cherezov, V.; Katritch, V.; Jiang, H.; Stevens, R. C.; Jacobson, K. A.; Zhao, Q.; Wu, B. Two disparate ligand-binding sites in the human P2Y receptor. *Nature* **2015**.

49. Zhang, C.; Srinivasan, Y.; Arlow, D. H.; Fung, J. J.; Palmer, D.; Zheng, Y.; Green, H. F.; Pandey, A.; Dror, R. O.; Shaw, D. E.; Weis, W. I.; Coughlin, S. R.; Kobilka, B. K. High-resolution crystal structure of human protease-activated receptor 1. *Nature* **2012**, *492*, 387-92.
50. Hanson, M. A.; Roth, C. B.; Jo, E.; Griffith, M. T.; Scott, F. L.; Reinhart, G.; Desale, H.; Clemons, B.; Cahalan, S. M.; Schuerer, S. C.; Sanna, M. G.; Han, G. W.; Kuhn, P.; Rosen, H.; Stevens, R. C. Crystal structure of a lipid G protein-coupled receptor. *Science* **2012**, *335*, 851-5.
51. Parrill, A. L.; Tigyi, G. Integrating the puzzle pieces: the current atomistic picture of phospholipid-G protein coupled receptor interactions. *Biochim Biophys Acta* **2013**, *1831*, 2-12.
52. Egloff, P.; Hillenbrand, M.; Klenk, C.; Batyuk, A.; Heine, P.; Balada, S.; Schlinkmann, K. M.; Scott, D. J.; Schutz, M.; Pluckthun, A. Structure of signaling-competent neurotensin receptor 1 obtained by directed evolution in *Escherichia coli*. *Proc Natl Acad Sci U S A* **2014**, *111*, E655-62.
53. Yin, J.; Mobarec, J. C.; Kolb, P.; Rosenbaum, D. M. Crystal structure of the human OX2 orexin receptor bound to the insomnia drug suvorexant. *Nature* **2015**, *519*, 247-50.
54. Hollenstein, K.; Kean, J.; Bortolato, A.; Cheng, R. K.; Dore, A. S.; Jazayeri, A.; Cooke, R. M.; Weir, M.; Marshall, F. H. Structure of class B GPCR corticotropin-releasing factor receptor 1. *Nature* **2013**, *499*, 438-43.
55. Hollenstein, K.; de Graaf, C.; Bortolato, A.; Wang, M. W.; Marshall, F. H.; Stevens, R. C. Insights into the structure of class B GPCRs. *Trends Pharmacol Sci* **2014**, *35*, 12-22.
56. Coin, I.; Katritch, V.; Sun, T.; Xiang, Z.; Siu, F. Y.; Beyermann, M.; Stevens, R. C.; Wang, L. Genetically encoded chemical probes in cells reveal the binding path of urocortin-I to CRF class B GPCR. *Cell* **2013**, *155*, 1258-69.
57. Siu, F. Y.; He, M.; de Graaf, C.; Han, G. W.; Yang, D.; Zhang, Z.; Zhou, C.; Xu, Q.; Wacker, D.; Joseph, J. S.; Liu, W.; Lau, J.; Cherezov, V.; Katritch, V.; Wang, M. W.; Stevens, R. C. Structure of the human glucagon class B G-protein-coupled receptor. *Nature* **2013**, *499*, 444-9.
58. Dore, A. S.; Okrasa, K.; Patel, J. C.; Serrano-Vega, M.; Bennett, K.; Cooke, R. M.; Errey, J. C.; Jazayeri, A.; Khan, S.; Tehan, B.; Weir, M.; Wiggin, G. R.; Marshall, F. H. Structure of class C GPCR metabotropic glutamate receptor 5 transmembrane domain. *Nature* **2014**, *511*, 557-62.
59. Gregory, K. J.; Conn, P. J. Molecular Insights into Metabotropic Glutamate Receptor Allosteric Modulation. *Mol Pharmacol* **2015**.
60. Wu, H.; Wang, C.; Gregory, K. J.; Han, G. W.; Cho, H. P.; Xia, Y.; Niswender, C. M.; Katritch, V.; Meiler, J.; Cherezov, V.; Conn, P. J.; Stevens, R. C. Structure of a class C GPCR metabotropic glutamate receptor 1 bound to an allosteric modulator. *Science* **2014**, *344*, 58-64.
61. Wang, C.; Wu, H.; Katritch, V.; Han, G. W.; Huang, X. P.; Liu, W.; Siu, F. Y.; Roth, B. L.; Cherezov, V.; Stevens, R. C. Structure of the human smoothed receptor bound to an antitumour agent. *Nature* **2013**, *497*, 338-43.
62. Hoch, L.; Faure, H.; Roudaut, H.; Schoenfelder, A.; Mann, A.; Girard, N.; Bihannic, L.; Ayrault, O.; Petricci, E.; Taddei, M.; Rognan, D.; Ruat, M. MRT-92 inhibits Hedgehog signaling by blocking overlapping binding sites in the transmembrane domain of the Smoothed receptor. *FASEB J* **2015**.
63. Wang, C.; Wu, H.; Evron, T.; Vardy, E.; Han, G. W.; Huang, X. P.; Hufeisen, S. J.; Mangano, T. J.; Urban, D. J.; Katritch, V.; Cherezov, V.; Caron, M. G.; Roth, B. L.; Stevens, R. C. Structural basis for Smoothed receptor modulation and chemoresistance to anticancer drugs. *Nat Commun* **2014**, *5*, 4355.

### **Supplementary files to generate the images in Figure 3.**

3eml\_density.pml PyMOL commands to generate Figure 3, top left panel

3eml\_lig\_density.pml PyMOL commands to generate Figure 3, bottom left panel

4eiy\_density.pml PyMOL commands to generate Figure 3, top right panel

4eiy\_lig\_density.pml PyMOL commands to generate Figure 3, bottom right panel

In order to run successfully these scripts in PyMOL:

1. Download the files containing the crystallographic structure and the electron density map of each protein. These files can be obtained by navigating, respectively to the Protein Data Bank (PDB) (<http://www.pdb.org>) and the Electron Density Server (EDS) at Uppsala University (<http://eds.bmc.uu.se/eds/>), searching for each PDB code (in this case, 3EML and 4EIY), and looking for the 'Download' sections.

In the EDS, in order to generate a 'standard' map for visual inspection of the experimental electron density, download the 2mFo-DFc map in CCP4 format. Once downloaded, rename the files to '3eml\_map.ccp4' and '4eiy\_map.ccp4'.

These files (3eml.pdb, 3eml\_map.ccp4, 4eiy.pdb, 4eiy\_map.ccp4) need to be in the same directory where the scripts will be executed.

2. Initiate a PyMOL session and move to the directory where the structure and electron density files are located by using the command 'cd' in the command line section of the PyMOL window; e.g.

```
> cd /Users/johndoe/Documents/Structures
```

(See [http://www.pymolwiki.org/index.php/Practical\\_Pymol\\_for\\_Beginners](http://www.pymolwiki.org/index.php/Practical_Pymol_for_Beginners) for a basic tutorial on PyMOL).

MOL #99663

3. Run the script by typing its name preceded by the symbol '@', in the command line section of PyMOL; e.g.

```
> @3eml_density.pml
```

These scripts can be opened with any text editor, and modified to obtain different images.

### **Supplementary files to generate the images in Figure 4.**

3eml\_bfactors.pml     PyMOL commands to generate Figure 4, left panel

4eiy\_bfactors.pml     PyMOL commands to generate Figure 4, right panel

In order to run successfully these scripts in PyMOL:

1. Download the files containing the crystallographic structure of each protein. These files can be obtained by navigating to the Protein Data Bank (PDB) (<http://www.pdb.org>), searching for each PDB code (in this case, 3EML and 4E1Y), and looking for the 'Download' section.

These files (3eml.pdb, 4eiy.pdb) need to be in the same directory where the scripts will be executed.

2. Initiate a PyMOL session and move to the directory where the structure files are located by using the command 'cd' in the command line section of the PyMOL window; e.g.

```
> cd /Users/johndoe/Documents/Structures
```

(See [http://www.pymolwiki.org/index.php/Practical\\_Pymol\\_for\\_Beginners](http://www.pymolwiki.org/index.php/Practical_Pymol_for_Beginners) for a basic tutorial on PyMOL).

3. Run the script by typing its name preceded by the symbol '@', in the command line section of PyMOL; e.g.

```
> @3eml_bfactors.pml
```

These scripts can be opened with any text editor, and modified to obtain different images.
